# Supplementary material for: Empfehlungen zur Gestaltung und Qualitätskontrolle der anwendungsorientierten Parcoursprüfung in der psychotherapeutischen Approbation
Source: Atypon-hosted journal article supplement (doi:10.1026/0033-3042/a000582), 2022-01-01
Supplement: 0033-3042_a000582_esm1.pdf [file 0033-3042_a000582_esm1.pdf]

## Elektronisches Supplement 1 (ESM 1)

# Empfehlungen zur Gestaltung und Qualitätskontrolle der anwendungsorientierten Parcoursprüfung in der psychotherapeutischen Approbation

Eva-Lotta Brakemeier<sup>1,2</sup>, Svenja Taubner<sup>3</sup>, Malte Schwinger<sup>2</sup>, Oliver Wilhelm<sup>4</sup>, Winfried Rief<sup>2</sup>

### **Teil 1: Über die Entscheidungsfindung zur Parcours-Prüfung**

Im Rahmen des Gesetzgebungsverfahrens wurden verschiedene Aspekte in die Diskussionen zu einer Staatsprüfung zur Approbation in Psychotherapie eingebracht. Von Seiten der Gesundheitsvertretungen, insbesondere der Länder, wurde der Wunsch einer vergleichbaren bundesweiten Prüfung vorgetragen, die vor allem die gesundheitlich relevanten Qualifizierungsaspekte einer Approbation sicherstellen sollte (Patientinnen- und Patientenfürsorge; Reduktion von Risiken); aber auch deutlich darüber hinausgehende Vorschläge für staatliche Prüfungen wurden vorgebracht (mehrere schriftliche Prüfungen zu verschiedenen Studienphasen). Von Seiten der Wissenschaftsvertretungen und der Hochschulen wurde eingebracht, dass im Rahmen der Bachelor- und Masterstudiengänge die Hochschulautonomie weiter gestärkt werden sollte, so dass übergebührende Eingriffe in die Hochschulautonomie, etwa bei Lehrinhalten oder durch Prüfungen, nicht vertretbar seien. Auch sollten Variationen der Studiengänge möglich sein, anstatt eine Überstandardisierung zu befördern. Durch die „Bologna-Reform“ hat zusätzlich die Anzahl an Prüfungen in den Studiengängen deutlich zugenommen, so dass die Dopplung von Prüfungsgegenständen zwischen Prüfungen der Bachelor- und Masterstudiengänge einerseits sowie der staatlichen Prüfung andererseits zu vermeiden sind. Deshalb stand die Wissenschaftsseite der Länder staatlichen Prüfungen grundsätzlich kritisch gegenüber. Aus diesen Verhandlungen in den Jahren 2016-2018 entstand der nun im Gesetz und in der Approbationsordnung vorliegende Vorschlag: Im Gegensatz zu den studiumsintimenten Prüfungen sollen weniger die deklarativen Inhalte im Vordergrund stehen, sondern die aus Sicht des Patientinnen- und Patientenwohls primär relevanten praxisbezogenen Kompetenzen, hier an fünf Tätigkeitsbereichen festgemacht. Eine Vergleichbarkeit der festzulegenden Prüfungsgegenstände und Prüfungen ist durch eine geeignete Aufgabenentwicklung, Standardisierung und Validierung der Parcours-Prüfungen sowie Standardisierung der Bewertung durch Checklisten sicherzustellen. Augenscheinlich ist diese Setzung ökonomisch nur durch die Beteiligung verstetigter zentraler Institutionen zu erreichen.

Am 15. November 2019 wurde das Gesetz zur Reform der Psychotherapeutenausbildung erlassen (Bundesgesetzblatt, 2019, Teil 1, S. 1604), welches die Ausbildung, die zum Beruf der Psychotherapeutin/des Psychotherapeuten führt, grundlegend reformiert und auf eine neue Rechtsgrundlage gestellt hat. Das Gesetz schreibt vor, dass die Approbation als Psychotherapeutin/Psychotherapeut künftig nicht mehr nach einer postgradualen Ausbildung erteilt wird, sondern bereits nach dem erfolgreichen Abschluss eines Bachelor- und eines

Masterstudiums sowie dem Bestehen der psychotherapeutischen Prüfung erfolgt. Die für die Umsetzung des Gesetzes notwendige Approbationsordnung für Psychotherapeutinnen und Psychotherapeuten (PsychThApprO), welche am 14.02.2020 die Zustimmung des deutschen Bundesrats erhalten hat, wurde am 04.03.2020 veröffentlicht (Bundesgesetzblatt, 2020). Diese Gesetzesänderung erfordert nicht nur neue Formate der Handlungsorientierung in der Hochschullehre, sondern auch für die Psychologie neue praxisnahe Prüfungsformate. Insbesondere ist hier die sogenannte „Anwendungsorientierte Parcoursprüfung“ als Teil der staatlichen Approbationsprüfung zu nennen, welche im Unterabschnitt 3 der Approbationsordnung beschrieben wird (Bundesgesetzblatt, 2020). Diese strukturierte klinisch-praktische Prüfung wurde nach Vorbild des Prüfungsformats „Objective Structured Clinical Examination“ (OSCE; Harden et al., 1975) entworfen, welches in der Medizin mittlerweile als empfohlener Standard zur Erfassung klinischer Kompetenzen gilt (Chisnall et al., 2015; Turner & Dankoski, 2008; Vaidya & Ramchandani, 2008). Die medizinische OSCE-Prüfung beinhaltet verschiedene Stationen, welche die Prüfungskandidierenden in geplanter und strukturierter Weise durchlaufen, um deklaratives und insbesondere prozedurales Wissen zu zeigen. Die Prüfung zielt auf die Abbildung praxisbezogener Kompetenzen (vgl. Wilhelm & Nickolaus, 2013). Die Bewertung erfolgt durch Prüferinnen und Prüfer unter Nutzung standardisierter und validierter Checklisten. In der medizinischen Ausbildung werden OSCEs mit Simulationspatientinnen und -patienten als etablierte Prüfungsform in Modulprüfungen eingesetzt, wobei sie umfangreich validiert und als relevant für die Prüfungspraxis beurteilt wurden, ihre Einführung durch den neuen Masterplan Medizinstudium aber auch nicht unumstritten ist (Hodges et al., 2014; Park et al., 2004; Walters, Osborn & Raven, 2005). Diese OSCE Prüfung ist jedoch auch in der Medizin noch nicht Teil der Staatsprüfung, welche zur Approbation führt, wobei in einem Referentenentwurf einer geänderten Approbationsordnung für Ärzte und Ärztinnen vom 15.01.2021 die OSCE Prüfung als Teil der Staatsprüfung gefordert wird. Diese Einführung wird jedoch ebenfalls kontrovers diskutiert: so fordert die Deutsche Hochschulmedizin e.V. in einem Kommentar zum Referentenentwurf, den „M3-OSCE“ zu streichen (s. Stellungnahme des Medizinischen Fakultäten Tages; [https://medizinische-fakultaeten.de/wp-content/uploads/2021/01/DHM\\_Kommentar\\_ÄApprO\\_RefE\\_2021-01-15\\_b.pdf](https://medizinische-fakultaeten.de/wp-content/uploads/2021/01/DHM_Kommentar_ÄApprO_RefE_2021-01-15_b.pdf)). Ähnlich dieser OSCE-Prüfung in der Medizin soll zukünftig die in der PsychThApprO beschriebene Parcoursprüfung in der psychotherapeutischen Staatsprüfung eingesetzt werden. Hierbei wurde vom Gesetzgeber bewusst der Terminus Parcours gewählt, da eine Parcoursprüfung zulässige Prüfungsformate weniger einschränkt als dies bei einer Restriktion auf OSCE-Konstellationen der Fall wäre. Aktuell werden OSCEs oder Parcoursprüfungen als Prüfungsformat weder im Psychologiestudium noch in der Psychotherapieausbildung mit anschließender Approbation systematisch eingesetzt; auch erfolgt der Einsatz von Simulationspatientinnen und -patienten (SP) bisher nicht systematisch in Psychologie-Studiengängen, wobei erste positive Studien existieren (Alpers & Steiger-White, 2020; Evers & Taubner, 2018; Kühne, Maaß & Weck, 2021; Partschfeld et al., 2013). Insgesamt liegen für diesen Bereich nur wenige konsequent evaluierte Vorerfahrungen vor.

## Teil 2: Beschreibung der neuen Parcoursprüfung sowie derzeitiger Stand

Im Folgenden wird die zu erarbeitende Parcoursprüfung gemäß der neuen Gesetzgebung und der PsychThApprO genauer beschrieben. Zum besseren und schnelleren Verständnis sind in der Tabelle 1 des Papers die wichtigsten Begriffe samt einer kurzen Definition bzw. Beschreibung angeführt.

In der PsychThApprO ist festgelegt, dass der beschriebene Parcours aus fünf Stationen (à 20 Minuten) besteht, bei denen jeweils geschultes Simulationspersonal einzusetzen ist. Jeweils fünf Prüfungskandidierende sollen die Prüfung üblicherweise an verschiedenen Stationen beginnen und durchlaufen diese dann in der Regel in einer festen Sequenz. In der Tabelle ESM 1 sind die in der Parcoursprüfung abzubildenden klinisch praktischen Inhalte (vgl. § 48 Absatz 2 bis 6) gemäß der Kompetenzen abgebildet, die nachgewiesen werden müssen.

**Tabelle ESM 1.** Fünf Stationen der in der Parcoursprüfung abzubildenden klinisch praktischen Inhalte sowie deren Beschreibung (vgl. PsychThApprO § 48, Absatz 2 bis 6)

| Station | Klinisch praktische Inhalte                                                               | Beschreibung                                                                                                                                                                                                                                              |
|---------|-------------------------------------------------------------------------------------------|-----------------------------------------------------------------------------------------------------------------------------------------------------------------------------------------------------------------------------------------------------------|
| 1       | <b>Sicherheit der behandelten Personen</b>                                                | Die Prüfungskandidierenden zeigen, dass sie zu einer altersgerechten, umfassenden und sachgerechten Risikoeinschätzung in der Lage sind.                                                                                                                  |
| 2       | <b>Therapeutische Beziehungsgestaltung</b>                                                | Die Prüfungskandidierenden demonstrieren, dass sie Probleme in der therapeutischen Beziehungsgestaltung erkennen und diesen Problemen in geeigneter Form begegnen.                                                                                        |
| 3       | <b>Diagnostik</b>                                                                         | Die Prüfungskandidierenden stellen eine zutreffende Diagnose über psychische Störungen.                                                                                                                                                                   |
| 4       | <b>Patientinnen- und Patienteninformation sowie Patientinnen- und Patientenaufklärung</b> | Die Prüfungskandidierenden tragen durch angemessene Informationsvermittlung zu einer selbstbestimmten Patientinnen- und Patientenentscheidung bzw. deren gesetzlichen Vertreterinnen und Vertretern bei.                                                  |
| 5       | <b>Leitlinienorientierte Behandlungsempfehlungen</b>                                      | Die Prüfungskandidierenden informieren Patientinnen und Patienten bzw. ggf. deren gesetzliche Vertreterinnen und Vertreter angemessen und diagnosebezogen über empfohlene Behandlungsmöglichkeiten, ungeachtet des persönlichen Spezialisierungsbereichs. |

In der PsychThApprO wird im Paragraph 49 festgehalten, dass für jeden Prüfungstermin der anwendungsorientierten Parcoursprüfung ein Pool an Prüfungsaufgaben für die fünf genannten Kompetenzbereiche erstellt werden soll. Aus diesem Pool an Prüfungsaufgaben wählt der/die Prüfungsvorsitzende vor Ort einen Prüfungsparcours und mindestens einen Ersatzparcours aus (§ 51 (1) PsychThApprO; s. auch Referentenentwurf zur Reform dieser Punkte).

Die Durchführung der staatlichen Prüfung wurde von den Ländern im Staats-Abkommen an das Institut für medizinische und pharmazeutische Prüfungsfragen (IMPP, <https://www.impp.de/start.html>) delegiert, das als rechtsfähige Anstalt des öffentlichen Rechts ähnliche Aufgaben auch in der Medizin übernimmt bzw. übernehmen soll. Das IMPP soll die Erarbeitung der Prüfungsfragen für die fünf Stationen, die Schulungen der Prüferinnen bzw.

Prüfer und der SPs sowie die Prüfungsfortentwicklung übernehmen. Das IMPP beschäftigt Mitarbeiterinnen und Mitarbeiter, welche sich explizit der Kommunikation zwischen dem IMPP, den Landesprüfungsämtern und den Universitäten widmen und für die evidenzbasierte Konzeption, Entwicklung, Pilotierung und bundesweite Implementierung und Koordination zuständig sind. Alle Landesprüfungsämter, denen die Hauptverantwortung für die Prüfungsdurchführung obliegt, sind angehalten, bei der Durchführung der bundeseinheitlichen Prüfungstermine die vom IMPP erarbeiteten Prüfungsfragen zu verwenden (vergl. BVerwG, Urt. v. 19. Mai 2005, Az.: 6 C 14.04; <https://www.bverwg.de/190505U6C14.04.0>). Beim Landesprüfungsamt melden sich die Studierenden zur Prüfung an, von dort erhalten sie die Zulassung und den Prüfungsbescheid. Zur möglichst einheitlichen und damit die Chancengleichheit während der Durchführung der bundeseinheitlichen Examina sollten Landesprüfungsämter und IMPP eng zusammen arbeiten.

Es ist aufgrund des logistischen Aufwands nicht geplant, dass die Prüfungstermine über Standorte hinweg fixiert sein sollten. An jedem Standort soll jedoch nach aktueller Planung zum Prüfungstermin an den einzelnen Stationen immer die gleiche Vignette verwendet und die gleichen Beurteilungsmaßstäbe angelegt werden. Die Sequenz der Stationen durch den ringförmigen Parcours ist fix. Jede Station dient der Prüfung genau eines Kompetenzbereiches.

An einer Umfrage des Fakultätentages Psychologie, die im März 2021 vorgestellt wurde, nahmen 59 Hochschulen teil. Die Umfrage ergibt bzgl. der Planungen der Institute des neuen M.Sc. Studiengangs Psychologie mit Schwerpunkt Klinische Psychologie und Psychotherapie im Sinne des neuen PsychThG, dass 13 Hochschulen den Start des neuen M.Sc.-Studiengangs für das Wintersemester 2021/22, 14 weitere für das Wintersemester 2022/23 sowie 17 für das Wintersemester 2023/24 vorbehaltlich der Finanzierung der Studiengänge, der notwendigen klinisch-psychotherapeutischen Infrastruktur sowie der zusätzlich zu den Masterprüfungen zu leistenden Staatsprüfungen planen. Bei 7 Hochschulen ist die Einführung sowie der Beginn unklar und 8 Hochschulen verneinen, den M.Sc. Studiengang einführen zu wollen. Eine Hochschule, die Medizinische Hochschule Neubrandenburg, die an der Umfrage nicht teilnahm, hat den neuen Approbations-Studiengang bereits im WS 2020/21 begonnen. Mithin sollten erste Fassungen einer zentral entwickelten Parcoursprüfung in erprobter Form also bereits ab Herbst 2022 verfügbar sein, und ab Herbst 2023 wird erstmals ein größerer Prüfungsbedarf bestehen.

Die Entwicklung, Durchführung und Weiterentwicklung dieses für die Psychologie neuartigen Prüfungsformates wird von vielen in der Hochschullehre tätigen Kolleginnen und Kollegen als wichtige Herausforderung angesehen (vgl. Wilhelm et al., 2020). Erfahrungen einer Pilotstudie, in der eine Kurzform der Parcoursprüfung im Rahmen einer Modulprüfung des M.Sc. Psychologie zur Anwendung kam, weisen auf eine gute Umsetzbarkeit dieses Prüfungsformats hin (Brakemeier et al., 2020): Die Auswertung von Fragebögen deuten darauf hin, dass sowohl die 14 Prüfungskandidierenden als auch die Prüfenden und die geschulte Simulationspatientin die Prüfung als geeignet empfanden, die praktischen Fertigkeiten abzubilden und zudem als objektiv und praxisnah bewerteten. Allerdings gaben 50% der Prüfungskandidierenden an, dass die Prüfung sie gestresst habe, gleichzeitig gaben 100% an, dass sie auch Spaß gemacht hätte.

## **Teil 3: Gestaltung der dritten, vierten und fünften Stationen<sup>1</sup> mit den jeweils relevanten spezifischen Kompetenzen**

### Dritte Station: Diagnostik

Gegenstand der dritten Station ist der Kompetenzbereich **Diagnostik**. In diesem Kompetenzbereich hat die Prüfungskandidatin oder der Prüfungskandidat zu zeigen, dass sie oder er eine zutreffende Diagnose stellen kann. Abgesehen von einer aktiven, expliziten, systematischen und theoriegeleiteten Diagnostik zu Therapiebeginn sollte diese Station aus unserer Sicht auch die Prozess- und Ergebnisdiagnostik einschließen. Wir schlagen vor, dass diese Station jeweils in zwei Abschnitte aufgeteilt wird, wobei der erste variiert wird (Exploration / Anamnese auf verschiedenen Ebenen des Diagnosemodells und während verschiedener Zeitpunkte einer Psychotherapie) und im zweiten eine (Verdachts-) Diagnosestellung aufgrund der bisher explorierten Befunde oder Materialien durchgeführt werden sollte samt Vermittlung derselben (vgl. Tab. ESM 2).

Wir empfehlen, entsprechend der in der Approbationsordnung geforderten verfahrenübergreifenden Lehre auch ein verfahrenübergreifendes (transtheoretisches) Störungsmodell als Basis für diese Station zu wählen (z.B. Rief & Strauß, 2021). Zudem basieren die folgenden Ausführungen auf Überlegungen zur Diagnostik von Jacobi (2017) und Willutzki & Schürmann-Vengels (2021). Im zweiten Teil sollten die Prüfungskandidierenden zeigen, dass sie die therapielevanten Bereiche und jeweils wichtigen diagnostischen (meist Fragebogen-)Zugänge kennen und diese auch in der Praxis adäquat einsetzen können.

Die derzeitige State-of-the-Art-Diagnoseermittlung wird unterstützt durch die Durchführung entsprechender diagnostischer Interviews, zum Beispiel SCID-5-CV und SCID-5-PD (Beesdo-Baum, Zaudig & Wittchen, 2019a, 2019b) oder DIPS (Margraf et al., 2021) bzw. Kinder-DIPS (Margraf, Cwik, Pflug, & Schneider, 2017; Schneider, Pflug, In-Albon, & Margraf, 2017). Auch weitere Ansätze (Verhaltenstests, psychophysiologische Messungen, Fremdbeurteilung, Ecologic Momentary Assessment) können hier als Prüfungsmaterial herangezogen werden. Schließlich erscheint die lege artis Erfassung des psychopathologischen Befunds (z.B. gemäß der Arbeitsgemeinschaft für Methodik und Dokumentation in der Psychiatrie, AMDP, 2018) sinnvoll abprüfbar.

---

<sup>1</sup> Die Gestaltungen der ersten und zweiten Stationen werden im Hauptpaper beschrieben.

**Tabelle ESM 2.** Vorschlag für Themen des Kompetenzbereich 3 (Diagnostik) mit Beispielen, spezifischen Kompetenzen und deren Bewertung (Checkliste)

| Thema / Gegenstand                                                                           | Beispiel-Situationen                                                                                                                                                                                                                                                                                                         | Spezifische Kompetenzen                                                                                                                                                                                                                                                            | Bewertung (Checkliste)<br>6 = exzellent, 5 = sehr gut, 4 = gut, 3 = zufriedenstellend, 2 = mittelmäßig, 1 = gerade ausreichend, 0 = mangelhaft;<br>anbei jeweils Beispiele für <b>6, 4, 2</b> und <b>0</b>                                                                                                                                                                                                                                                                                                                                                                                    |
|----------------------------------------------------------------------------------------------|------------------------------------------------------------------------------------------------------------------------------------------------------------------------------------------------------------------------------------------------------------------------------------------------------------------------------|------------------------------------------------------------------------------------------------------------------------------------------------------------------------------------------------------------------------------------------------------------------------------------|-----------------------------------------------------------------------------------------------------------------------------------------------------------------------------------------------------------------------------------------------------------------------------------------------------------------------------------------------------------------------------------------------------------------------------------------------------------------------------------------------------------------------------------------------------------------------------------------------|
| Teil 1: Exploration / Anamnese auf verschiedenen Ebenen und zu unterschiedlichen Zeitpunkten |                                                                                                                                                                                                                                                                                                                              |                                                                                                                                                                                                                                                                                    |                                                                                                                                                                                                                                                                                                                                                                                                                                                                                                                                                                                               |
| Therapiebeginn:<br>Erarbeitung eines<br>Diagnosemodells mit<br>Fokus...                      | Aufgabenbeispiel:<br><i>Finden Sie heraus, ob überhaupt und wenn ja welche psychische Störung die Patientin oder der Patient hat (kurze Fallvignette eines Störungsbildes) und fokussieren Sie sich dabei insbesondere auf die ...</i>                                                                                       |                                                                                                                                                                                                                                                                                    |                                                                                                                                                                                                                                                                                                                                                                                                                                                                                                                                                                                               |
| ... aktuelle Symptomatik                                                                     | <i>... aktuelle Symptomatik. Verwenden Sie dafür auch Interviews, die Sie auswählen können (zur Verfügung gestellt werden u.a.: SCID I und II, DIPS, Kinder-DIPS sowie die störungsspezifischen gängigen Interviews; SP kann Patientin / Patient selbst oder Bezugsperson sein)</i><br><br><i>Schwierigkeitsgrad: mittel</i> | Aktive, systematische und theoriegeleitete Exploration der aktuellen Symptomatik unter Beachtung der drei komplementären Zugänge: biologisch/somatisch, psychisch/psychologisch, sozial/ökologisch sowie verschiedener Funktionsbereiche (intrapersonell, interpersonelle, sozial) | P gelingt es dem Alter entsprechend exzellent, die aktuelle Symptomatik aktiv, systematisch und theoriegeleitet zu explorieren ( <b>6</b> )<br>P gelingt es dem Alter entsprechend gut, die aktuelle Symptomatik aktiv, systematisch und theoriegeleitet zu explorieren ( <b>4</b> )<br>P gelingt es dem Alter entsprechend mittelmäßig, die aktuelle Symptomatik aktiv, systematisch und theoriegeleitet zu explorieren ( <b>2</b> )<br>P gelingt ist nicht in der Lage, die aktuelle Symptomatik dem Alter entsprechend aktiv, systematisch und theoriegeleitet zu explorieren ( <b>0</b> ) |
| ... Prädispositionen oder Vulnerabilitäten einschließlich der Schutzfaktoren                 | <i>... Prädispositionen oder Vulnerabilitäten einschließlich der Schutzfaktoren. Explorieren Sie dabei insbesondere die empirisch belegten Risikofaktoren für die Entstehung psychischer, psychosomatischer</i>                                                                                                              | Exploration der Prädispositionen / Vulnerabilitäten einschließlich der Schutzfaktoren unter Beachtung der drei komplementären komplementär                                                                                                                                         | P gelingt es exzellent, die Prädispositionen / Vulnerabilitäten umfassend zu explorieren ( <b>6</b> )<br>P gelingt es gut, die Prädispositionen / Vulnerabilitäten umfassend zu explorieren ( <b>4</b> )<br>P gelingt es mittelmäßig, die Prädispositionen / Vulnerabilitäten umfassend zu explorieren ( <b>2</b> )                                                                                                                                                                                                                                                                           |

|                                                                |                                                                                                                                                                                                                                                                       |                                                                                                                                                                                                                                                                 |                                                                                                                                                                                                                                                                                                                                                                                                                                                                                             |
|----------------------------------------------------------------|-----------------------------------------------------------------------------------------------------------------------------------------------------------------------------------------------------------------------------------------------------------------------|-----------------------------------------------------------------------------------------------------------------------------------------------------------------------------------------------------------------------------------------------------------------|---------------------------------------------------------------------------------------------------------------------------------------------------------------------------------------------------------------------------------------------------------------------------------------------------------------------------------------------------------------------------------------------------------------------------------------------------------------------------------------------|
|                                                                | <p><i>und körperlicher Erkrankungen, die aus der Literatur bekannt sind.</i></p> <p>(SP kann Patientin / Patient selbst oder Bezugsperson sein)</p> <p>Schwierigkeitsgrad: mittel</p>                                                                                 | <p>ergänzenden Zugänge: biologisch/ genetisch, psychisch / psychologisch, sozial / ökologisch (insb. Beachtung der Gen-Umwelt Interaktion) sowie der aus der Literatur bekannten Risikofaktoren (z.B. Egle, 2020)</p>                                           | <p>P ist nicht in der Lage, die Prädispositionen / Vulnerabilitäten umfassend zu explorieren <b>(0)</b></p>                                                                                                                                                                                                                                                                                                                                                                                 |
| <p>... auslösende Faktoren (Ausbruch, Exazerbation)</p>        | <p><i>... auslösende Faktoren. Explorieren Sie dabei sämtliche Faktoren, die zu dem Ausbruch beigetragen bzw. zu der Exazerbation geführt haben könnten.</i></p> <p>(SP kann Patientin / Patient selbst oder Bezugsperson sein)</p> <p>Schwierigkeitsgrad: leicht</p> | <p>Exploration der Auslöser (Ausbruch, Exazerbation) wie Stress/Konflikte, mangelnde Bewältigung von Entwicklungsaufgaben, traumatische Erfahrungen bzw. Stressoren, Erinnerungen, soziokulturelle Einflüsse, subtile äußere und innere Veränderungen, etc.</p> | <p>P gelingt es exzellent, die auslösenden Faktoren zu explorieren <b>(6)</b></p> <p>P gelingt es gut, die auslösenden Faktoren zu explorieren <b>(4)</b></p> <p>P gelingt es mittelmäßig, die auslösenden Faktoren zu explorieren <b>(2)</b></p> <p>P ist nicht in der Lage, die auslösenden Faktoren zu explorieren <b>(0)</b></p>                                                                                                                                                        |
| <p>... aufrechterhaltende Faktoren und Zukunftserwartungen</p> | <p><i>... aufrechterhaltende Faktoren und Zukunftserwartungen. Explorieren Sie dabei sämtliche Faktoren, die zur Aufrechterhaltung beitragen können.</i></p> <p>(SP kann Patientin / Patient selbst oder Bezugsperson sein)</p> <p>Schwierigkeitsgrad: leicht</p>     | <p>Exploration der aufrechterhaltende Faktoren, insb. das wissenschaftlich am besten untersuchten Vermeidungs- und Sicherheitsverhalten und weitere Chronifizierungs-mechanismen sowie krankheits-sowie therapie-relevanten</p>                                 | <p>P gelingt es dem Alter entsprechend exzellent, die aufrechterhaltenden Faktoren und Zukunftserwartungen zu explorieren <b>(6)</b></p> <p>P gelingt es dem Alter entsprechend gut, die aufrechterhaltenden Faktoren und Zukunftserwartungen zu explorieren <b>(4)</b></p> <p>P gelingt es dem Alter entsprechend mittelmäßig, die aufrechterhaltenden Faktoren und Zukunftserwartungen zu explorieren <b>(2)</b></p> <p>P ist nicht in der Lage, die aufrechterhaltenden Faktoren und</p> |

|                                                |                                                                                                                                                                                                                                                                                                                                                              |                                                                                                                                                                                                                                                                                                                                                                                                                                                                                                                          |                                                                                                                                                                                                                                                                                                                                                                                                                                                                                                                                                                       |
|------------------------------------------------|--------------------------------------------------------------------------------------------------------------------------------------------------------------------------------------------------------------------------------------------------------------------------------------------------------------------------------------------------------------|--------------------------------------------------------------------------------------------------------------------------------------------------------------------------------------------------------------------------------------------------------------------------------------------------------------------------------------------------------------------------------------------------------------------------------------------------------------------------------------------------------------------------|-----------------------------------------------------------------------------------------------------------------------------------------------------------------------------------------------------------------------------------------------------------------------------------------------------------------------------------------------------------------------------------------------------------------------------------------------------------------------------------------------------------------------------------------------------------------------|
| ... Ressourcen und eigene Bewältigungsversuche | <p><i>... Ressourcen und eigene Bewältigungsversuch. Explorieren Sie dabei sämtliche Ressourcen sowie die Bewältigungsversuche, die die Patientin oder der Patient bereits angewendet hat, um schwierige Situationen oder Krisen zu bewältigen.</i></p> <p>(SP kann Patientin / Patient selbst oder Bezugsperson sein)</p> <p>Schwierigkeitsgrad: mittel</p> | <p>Erwartungen der Patientinnen und Patienten bzw. ggf. Bezugspersonen einschließlich kognitiven Immunisierungs- bzw. Abwehrprozesse</p> <p>Exploration der Ressourcen und eigenen bzw. familiären Bewältigungsversuche z.B. anhand der „Ressourcenziel“ (Ressourcen im Bereich der allgemeinen Lebensbewältigung, im Kontext erfolgreich bewältigter schwieriger Situationen und Krisen, im Zusammenhang mit der aktuellen Problematik, Blinde Flecken zur Nutzung von Ressourcen; Willutzki &amp; Teichmann, 2013)</p> | <p>Zukunftserwartungen dem Alter entsprechend zu explorieren (0)</p> <p>P gelingt es dem Alter entsprechend exzellent, die Ressourcen und eigenen Bewältigungsversuche zu explorieren (6)</p> <p>P gelingt es dem Alter entsprechend gut, die Ressourcen und eigenen Bewältigungsversuche zu explorieren (4)</p> <p>P gelingt es dem Alter entsprechend mittelmäßig, die Ressourcen und eigenen Bewältigungsversuche zu explorieren (2)</p> <p>P ist nicht in der Lage, die Ressourcen und eigenen Bewältigungsversuche dem Alter entsprechend zu explorieren (0)</p> |
| Differentialdiagnosen und Komorbiditäten       | <p>Aufgabenbeispiel: <i>Bei der/dem SP ist das Diagnosemodell weitestgehend bekannt und sie/er kommt mit einer Verdachtsdiagnose zu Ihnen – überprüfen Sie die Diagnose mit Patient oder Patientin bzw. Bezugsperson hinsichtlich möglicher Differentialdiagnosen und Komorbiditäten.</i></p>                                                                | <p>Prüfen von möglichen Differentialdiagnosen und Komorbiditäten</p>                                                                                                                                                                                                                                                                                                                                                                                                                                                     | <p>P gelingt dem Alter entsprechend exzellent, mögliche Differentialdiagnosen und Komorbiditäten zu explorieren (6)</p> <p>P gelingt es dem Alter entsprechend gut, mögliche Differentialdiagnosen und Komorbiditäten zu explorieren (4)</p> <p>P gelingt es dem Alter entsprechend mittelmäßig, mögliche Differentialdiagnosen und Komorbiditäten zu explorieren (2)</p> <p>P ist nicht in der Lage, mögliche Differentialdiagnosen und</p>                                                                                                                          |



|                                                          |                                                                                                                                                                                                                                             |                                                                                                                                                                                      |                                                                                                                                                                                                                                                                                                                                                                                                                                       |
|----------------------------------------------------------|---------------------------------------------------------------------------------------------------------------------------------------------------------------------------------------------------------------------------------------------|--------------------------------------------------------------------------------------------------------------------------------------------------------------------------------------|---------------------------------------------------------------------------------------------------------------------------------------------------------------------------------------------------------------------------------------------------------------------------------------------------------------------------------------------------------------------------------------------------------------------------------------|
|                                                          | (SP kann Patientin / Patient selbst oder Bezugsperson sein)                                                                                                                                                                                 |                                                                                                                                                                                      | Komorbiditäten dem Alter entsprechend zu explorieren (0)                                                                                                                                                                                                                                                                                                                                                                              |
| Spezifische Anamnesen: Suchtanamnese oder Sexualanamnese | Schwierigkeitsgrad: schwer                                                                                                                                                                                                                  |                                                                                                                                                                                      |                                                                                                                                                                                                                                                                                                                                                                                                                                       |
|                                                          | Aufgabenbeispiel 1: <i>Führen Sie bitte bei der/dem SP eine Suchtanamnese oder eine Sexualanamnese durch!</i>                                                                                                                               | Durchführung einer Suchtanamnese oder Sexualanamnese                                                                                                                                 | P gelingt es dem Alter entsprechend exzellent, eine Suchtanamnese oder Sexualanamnese durchzuführen (6)<br>P gelingt es dem Alter entsprechend gut, eine Suchtanamnese oder Sexualanamnese durchzuführen (4)<br>P gelingt es dem Alter entsprechend mittelmäßig, eine Suchtanamnese oder Sexualanamnese durchzuführen (2)<br>P ist nicht in der Lage, eine Suchtanamnese oder Sexualanamnese dem Alter entsprechend durchzuführen (0) |
|                                                          | Schwierigkeitsgrad: schwer                                                                                                                                                                                                                  |                                                                                                                                                                                      |                                                                                                                                                                                                                                                                                                                                                                                                                                       |
|                                                          | Aufgabenbeispiel 2: <i>Führen Sie bitte bei der/dem SP eine Familiennamnese inkl. psychischer und somatischer Vorerkrankungen durch!</i>                                                                                                    | Durchführung einer Familienanamnese                                                                                                                                                  | P gelingt es dem Alter entsprechend exzellent, eine Familienanamnese durchzuführen (6)<br>P gelingt es dem Alter entsprechend gut, eine Familienanamnese durchzuführen (4)<br>P gelingt es dem Alter entsprechend mittelmäßig, eine Familienanamnese durchzuführen (2)<br>P ist nicht in der Lage, eine Familienanamnese dem Alter entsprechend durchzuführen (0)                                                                     |
|                                                          | Schwierigkeitsgrad: mittel                                                                                                                                                                                                                  |                                                                                                                                                                                      |                                                                                                                                                                                                                                                                                                                                                                                                                                       |
| Prozessdiagnostik                                        | Aufgabenbeispiel: <i>Bitte schauen Sie sich die Prozessevaluationen (Zwischenmessungen) Ihrer / Ihres SP an. Bitte besprechen Sie anschließend die Ergebnisse sowie die daraus resultierenden möglichen Anpassungen der therapeutischen</i> | Einordnung der psychometrischen Informationen; Besprechung der zurückgemeldeten Daten sowie die daraus resultierenden möglichen Anpassungen der therapeutischen Strategien (adaptive | P gelingt es dem Alter entsprechend exzellent, die zurückgemeldeten Daten sowie die daraus resultierenden möglichen Anpassungen der therapeutischen Strategien zu besprechen (6)<br>P gelingt es dem Alter entsprechend gut, die zurückgemeldeten Daten sowie die daraus resultierenden möglichen Anpassungen der therapeutischen Strategien zu besprechen (4)                                                                        |

|                                                                            |                                                                                                                                                                                                                                           |                                                                                                                                                                                                                                |                                                                                                                                                                                                                                                                                                                                                                                                                                                                                                                                                                                                                                               |
|----------------------------------------------------------------------------|-------------------------------------------------------------------------------------------------------------------------------------------------------------------------------------------------------------------------------------------|--------------------------------------------------------------------------------------------------------------------------------------------------------------------------------------------------------------------------------|-----------------------------------------------------------------------------------------------------------------------------------------------------------------------------------------------------------------------------------------------------------------------------------------------------------------------------------------------------------------------------------------------------------------------------------------------------------------------------------------------------------------------------------------------------------------------------------------------------------------------------------------------|
|                                                                            | <i>Strategien mit ihr / ihm bzw. der Bezugsperson.</i>                                                                                                                                                                                    | Indikation, insb. Erkennen ungünstiger Verläufe)                                                                                                                                                                               | P gelingt dem Alter entsprechend mittelmäßig, die zurückgemeldeten Daten sowie die daraus resultierenden möglichen Anpassungen der therapeutischen Strategien zu besprechen <b>(2)</b><br>P ist nicht in der Lage, die zurückgemeldeten Daten sowie die daraus resultierenden möglichen Anpassungen der therapeutischen Strategien dem Alter entsprechend zu besprechen <b>(0)</b>                                                                                                                                                                                                                                                            |
|                                                                            | (SP kann Patientin / Patient selbst oder Bezugsperson sein)                                                                                                                                                                               |                                                                                                                                                                                                                                |                                                                                                                                                                                                                                                                                                                                                                                                                                                                                                                                                                                                                                               |
|                                                                            | Schwierigkeitsgrad: schwer                                                                                                                                                                                                                |                                                                                                                                                                                                                                |                                                                                                                                                                                                                                                                                                                                                                                                                                                                                                                                                                                                                                               |
| Teil 2: Verdacht-Diagnosestellung aufgrund der bisher explorierten Befunde |                                                                                                                                                                                                                                           |                                                                                                                                                                                                                                |                                                                                                                                                                                                                                                                                                                                                                                                                                                                                                                                                                                                                                               |
| Diagnosestellung zu Therapiebeginn                                         | Aufgabenbeispiel: <i>Auf Basis der Fallvignette und der bisher explorierten Informationen, welche Verdachts-Diagnose(n) ziehen Sie in Erwägung?</i>                                                                                       | Einordnung, ob überhaupt eine (oder mehrere) Störung(en) mit Krankheitswert vorliegt (vorliegen) und wenn ja, welche (Verdacht-Diagnosen)                                                                                      | P gelingt es exzellent, einzuordnen ob eine (oder mehrere) Störung(en) mit Krankheitswert vorliegen und ggf. eine Verdachtsdiagnose zu stellen <b>(6)</b><br>P gelingt es gut, einzuordnen ob eine (oder mehrere) Störung(en) mit Krankheitswert vorliegen und ggf. eine Verdachtsdiagnose zu stellen <b>(4)</b><br>P gelingt es mittelmäßig, einzuordnen ob eine (oder mehrere) Störung(en) mit Krankheitswert vorliegen und ggf. eine Verdachtsdiagnose zu stellen <b>(2)</b><br>P ist nicht in der Lage, einzuordnen ob eine (oder mehrere) Störung(en) mit Krankheitswert vorliegen und ggf. eine Verdachtsdiagnose zu stellen <b>(0)</b> |
|                                                                            | Schwierigkeitsgrad: mittel                                                                                                                                                                                                                |                                                                                                                                                                                                                                |                                                                                                                                                                                                                                                                                                                                                                                                                                                                                                                                                                                                                                               |
| Ergebnisdiagnostik                                                         | Aufgabenbeispiel: <i>Bitte schauen Sie sich die Prozessevaluationen (Zwischenmessungen) Ihrer / Ihres SP an und besprechen Sie mit ihr / ihm bzw. der Bezugsperson, wann der richtige Zeitpunkt der Therapieendes geeignet erscheint.</i> | Einordnung der psychometrischen Informationen bzgl. Erkennen, ob ausreichende und stabile Verbesserungen stattgefunden haben; Besprechung der zurückgemeldeten Daten sowie die daraus resultierenden möglichen Anpassungen der | P gelingt es dem Alter entsprechend exzellent, die zurückgemeldeten Daten sowie die daraus resultierenden möglichen Anpassungen der therapeutischen Strategien zu besprechen <b>(6)</b><br>P gelingt es dem Alter entsprechend gut, die zurückgemeldeten Daten sowie die daraus resultierenden möglichen Anpassungen der therapeutischen Strategien zu besprechen <b>(4)</b><br>P gelingt dem Alter entsprechend mittelmäßig, die zurückgemeldeten Daten sowie die daraus resultierenden möglichen                                                                                                                                            |
|                                                                            | (SP kann Patientin / Patient selbst oder Bezugsperson sein)                                                                                                                                                                               |                                                                                                                                                                                                                                |                                                                                                                                                                                                                                                                                                                                                                                                                                                                                                                                                                                                                                               |

|                               |                                                                                                                                               |                                                                                                                                                                                                                                                                                   |
|-------------------------------|-----------------------------------------------------------------------------------------------------------------------------------------------|-----------------------------------------------------------------------------------------------------------------------------------------------------------------------------------------------------------------------------------------------------------------------------------|
| Schwierigkeitsgrad:<br>leicht | therapeutischen<br>Strategien<br>(adaptive<br>Indikation, insb.<br>Erkennen<br>ungünstiger<br>Verläufe) und<br>des möglichen<br>Therapieendes | Anpassungen der therapeutischen<br>Strategien zu besprechen <b>(2)</b><br>P ist nicht in der Lage, die<br>zurückgemeldeten Daten sowie die<br>daraus resultierenden möglichen<br>Anpassungen der therapeutischen<br>Strategien dem Alter entsprechend<br>zu besprechen <b>(0)</b> |
|-------------------------------|-----------------------------------------------------------------------------------------------------------------------------------------------|-----------------------------------------------------------------------------------------------------------------------------------------------------------------------------------------------------------------------------------------------------------------------------------|

*Anmerkungen:* P = Prüfungskandidatin bzw. Prüfungskandidat, SP = Simulationspatientin bzw. Simulationspatient.

Wie in der Tabelle ersichtlich sollte die Variation u.a. dadurch erfolgen, dass auch eine Fremdbeurteilung zur Diagnosestellung (Multi-Informanten Ansatz) herangezogen wird (SP simuliert Eltern, Partnerin oder Partner, Lehrerin oder Lehrer).

Diese Kompetenzen zum Bereich Diagnostik werden gemäß der PsychThApprO (Anlage 1) größtenteils bereits bei den Inhalten bzw. Modulen, die im Bachelorstudiengang im Rahmen der hochschulischen Lehre zu vermitteln sind, aufgeführt (insb. 6. Psychologische Diagnostik). Im Masterstudiengang werden sie gemäß der Anlage 2 in den Inhalten bzw. Modulen 2. vertiefte Forschungsmethodik, 3. spezielle Störungs- und Verfahrenslehre der Psychotherapie, 6. vertiefte psychologische Diagnostik und Begutachtung und 7. berufsqualifizierende Tätigkeit II – vertiefte Praxis der Psychotherapie – vermittelt sowie in der Berufsqualifizierenden Tätigkeit III – angewandte Praxis der Psychotherapie (Paragraph 18) – praxisnah vertieft.

### **Vierte Station: Patientinnen- und Patienteninformation sowie Patientinnen- und Patientenaufklärung**

Gegenstand der vierten Station ist der Kompetenzbereich **Patientinnen- und Patienteninformation sowie Patientinnen- und Patientenaufklärung**. In diesem Kompetenzbereich hat die Prüfungskandidatin oder der Prüfungskandidat zu zeigen, dass sie oder er durch angemessene Patientinnen- und Patienteninformation zu einer selbstbestimmten Patientinnen- und Patientenentscheidung beiträgt. Aus unserer Sicht sollte dabei darauf geachtet werden, dass keine Überlappung mit Station 5 (Information über wissenschaftlich fundierte Behandlungsempfehlungen) auftritt. Zudem soll hier auch geprüft werden, ob die Prüfungskandidatin oder der Prüfungskandidat das Berufsrecht (vgl. z.B. Gerlach, 2021) sowie die Psychotherapie-Ethik (vgl. z.B. Trachsel, 2021) mit entsprechenden Handlungspflichten und Handlungsoptionen für Psychotherapeutinnen und Psychotherapeuten kennt sowie unerwünschte Behandlungseffekte und Nebenwirkungen der Psychotherapie (er)kennt und entsprechend darüber aufklären kann (vgl. z.B. Strauß, 2021). In der Tabelle ESM 3 finden sich drei Themen/Gegenstände mit Beispiel-Situationen sowie Vorschlägen zu den spezifischen Kompetenzen und Bewertungen.

**Tabelle ESM 3.** Vorschlag für Themen des Kompetenzbereich 4 (Patientinnen- und Patienteninformation und Patientinnen- und Patientenaufklärung) mit Beispielen, spezifischen Kompetenzen und deren Bewertung (Checkliste)

| Thema / Gegenstand                                                            | Beispiel-Situationen                                                                                                                                                                                                                                                                                                                                                                                                                                         | Spezifische Kompetenzen                                                                                                                                                                                                   | Bewertung ( <b>Checkliste</b> )<br>6 = exzellent, 5 = sehr gut, 4 = gut, 3 = zufriedenstellend, 2 = mittelmäßig, 1 = gerade ausreichend, 0 = mangelhaft; anbei jeweils Beispiele für <b>6, 4, 2</b> und <b>0</b>                                                                                                                                                                                                                                                                                                                                                                     |
|-------------------------------------------------------------------------------|--------------------------------------------------------------------------------------------------------------------------------------------------------------------------------------------------------------------------------------------------------------------------------------------------------------------------------------------------------------------------------------------------------------------------------------------------------------|---------------------------------------------------------------------------------------------------------------------------------------------------------------------------------------------------------------------------|--------------------------------------------------------------------------------------------------------------------------------------------------------------------------------------------------------------------------------------------------------------------------------------------------------------------------------------------------------------------------------------------------------------------------------------------------------------------------------------------------------------------------------------------------------------------------------------|
| Aufklärung und Information über Diagnose für Betroffene oder Angehörige       | <ul style="list-style-type: none"> <li>• „<i>Ich habe im Arztbrief gelesen, dass ich anscheinend eine Borderline Persönlichkeitsstörung habe – was ist das denn?</i>“</li> <li>• „<i>Mein Sohn die Diagnose ADHS erhalten - was ist das?</i>“</li> <li>• „<i>Mein Mann wurde mitgeteilt, dass er eine Autismus-Spektrumsstörung hat. Was kann ich denn darunter verstehen?</i>“</li> <li>• „<i>Was ist denn eine Störung mit Trennungsangst?</i>“</li> </ul> | <ul style="list-style-type: none"> <li>• Empathische und informierte Aufklärung über Diagnose für die oder den Betroffenen; ihre oder seine Angehörigen</li> </ul>                                                        | <p>P gelingt es dem Alter entsprechend exzellent, empathisch und informiert über die entsprechende Diagnose aufzuklären (<b>6</b>)</p> <p>P gelingt es dem Alter entsprechend gut, empathisch und informiert über die entsprechende Diagnose aufzuklären (<b>4</b>)</p> <p>P gelingt es dem Alter entsprechend überwiegend und/oder befriedigend, empathisch und informiert über die entsprechende Diagnose aufzuklären (<b>2</b>)</p> <p>P ist nicht in der Lage, empathisch und informiert sowie dem Alter entsprechend über die entsprechende Diagnose aufzuklären (<b>0</b>)</p> |
| Aufklärung und Information über Psychotherapie für Betroffene oder Angehörige | <ul style="list-style-type: none"> <li>• „<i>Was ist Psychotherapie?</i>“</li> </ul> <p>Schwierigkeitsgrad: leicht</p>                                                                                                                                                                                                                                                                                                                                       | <ul style="list-style-type: none"> <li>• Empathische und informierte Aufklärung über Psychotherapie für den Betroffenen; seine Angehörige oder seinen Angehörigen; dabei Berücksichtigen von Rahmenbedingungen</li> </ul> | <p>P gelingt es dem Alter entsprechend exzellent, empathisch und informiert über Psychotherapie aufzuklären (<b>6</b>)</p> <p>P gelingt es dem Alter entsprechend gut, empathisch und informiert über Psychotherapie aufzuklären (<b>4</b>)</p> <p>P gelingt es dem Alter entsprechend mittelmäßig, empathisch und informiert über Psychotherapie aufzuklären (<b>2</b>)</p> <p>P ist nicht in der Lage, empathisch und informiert dem Alter entsprechend über Psychotherapie aufzuklären (<b>0</b>)</p>                                                                             |
| Aufklärung und Information                                                    | <ul style="list-style-type: none"> <li>• „<i>Welche Rechte habe ich als Pat. bzgl.</i>“</li> </ul>                                                                                                                                                                                                                                                                                                                                                           | <ul style="list-style-type: none"> <li>• Empathische und informierte Aufklärung über</li> </ul>                                                                                                                           | <p>P gelingt es dem Alter entsprechend exzellent, empathisch und informiert über Verpflichtung zur</p>                                                                                                                                                                                                                                                                                                                                                                                                                                                                               |

|                                                                                                                    |                                                                                                                                                                                                                                                                                                                                                                                                                                                                                                      |                                                                                                                                                               |                                                                                                                                                                                                                                                                                                                                                                                                                                                                                                                                                                                                                                                                                   |
|--------------------------------------------------------------------------------------------------------------------|------------------------------------------------------------------------------------------------------------------------------------------------------------------------------------------------------------------------------------------------------------------------------------------------------------------------------------------------------------------------------------------------------------------------------------------------------------------------------------------------------|---------------------------------------------------------------------------------------------------------------------------------------------------------------|-----------------------------------------------------------------------------------------------------------------------------------------------------------------------------------------------------------------------------------------------------------------------------------------------------------------------------------------------------------------------------------------------------------------------------------------------------------------------------------------------------------------------------------------------------------------------------------------------------------------------------------------------------------------------------------|
| über<br>Verpflichtung<br>zur<br>Verschwiegenheit und<br>zum<br>Datenschutz<br>für Betroffene<br>oder<br>Angehörige | <i>Einsichtnahme in die<br/>Behandlungsunterlagen?<br/>“</i> <ul style="list-style-type: none"> <li>• <i>„Welche Rechte haben wir als Eltern? Werden wir über alles informiert, was unser Kinder sagt?“</i></li> </ul>                                                                                                                                                                                                                                                                               | Verpflichtung<br>zur<br>Verschwiegenheit und zum<br>Datenschutz                                                                                               | Verschwiegenheit und zum<br>Datenschutz aufzuklären <b>(6)</b><br>P gelingt es dem Alter entsprechend gut, empathisch und informiert über Verpflichtung zur Verschwiegenheit und zum Datenschutz aufzuklären <b>(4)</b><br>P gelingt es dem Alter entsprechend mittelmäßig empathisch und informiert über Verpflichtung zur Verschwiegenheit und zum Datenschutz aufzuklären <b>(2)</b><br>P ist nicht in der Lage, empathisch und informiert dem Alter entsprechend über Verpflichtung zur Verschwiegenheit und zum Datenschutz aufzuklären <b>(0)</b>                                                                                                                           |
|                                                                                                                    | Schwierigkeitsgrad:<br>mittel                                                                                                                                                                                                                                                                                                                                                                                                                                                                        |                                                                                                                                                               |                                                                                                                                                                                                                                                                                                                                                                                                                                                                                                                                                                                                                                                                                   |
| Aufklärung<br>und<br>Information<br>über<br>Nebenwirkungen und<br>Schäden für<br>Betroffene<br>oder<br>Angehörige  | <ul style="list-style-type: none"> <li>• <i>„Kann eine Psychotherapie auch Nebenwirkungen haben?“</i></li> <li>• <i>„Mein letzter Psychotherapeut hat mich öfters ans Knie gefasst – das fand ich total unangenehm. Er meinte, es sei Teil der Therapie. Was meinen Sie dazu?“</i></li> <li>• <i>„Ich habe mich während meiner letzten Therapie geradezu abhängig von meiner Therapeutin gefühlt. Sie hat immer alles für mich entschieden und dann war sie plötzlich nicht mehr da.“</i></li> </ul> | <ul style="list-style-type: none"> <li>• Empathische und informierte Aufklärung über Definition und Differenzierung von Nebenwirkungen und Schäden</li> </ul> | P gelingt es dem Alter entsprechend exzellent, empathisch und informiert über Definition und Differenzierung von Nebenwirkungen und Schäden aufzuklären <b>(6)</b><br>P gelingt es dem Alter entsprechend gut, empathisch und informiert über Definition und Differenzierung von Nebenwirkungen und Schäden aufzuklären <b>(4)</b><br>P gelingt es dem Alter entsprechend mittelmäßig, empathisch und informiert über Definition und Differenzierung von Nebenwirkungen und Schäden aufzuklären <b>(2)</b><br>P ist nicht in der Lage, empathisch und informiert dem Alter entsprechend über Definition und Differenzierung von Nebenwirkungen und Schäden aufzuklären <b>(0)</b> |
|                                                                                                                    | Schwierigkeitsgrad:<br>schwer                                                                                                                                                                                                                                                                                                                                                                                                                                                                        |                                                                                                                                                               |                                                                                                                                                                                                                                                                                                                                                                                                                                                                                                                                                                                                                                                                                   |

*Anmerkungen:* P = Prüfungskandidatin bzw. Prüfungskandidat, SP = Simulationspatientin bzw. Simulationspatient.

Weitere Themen bzw. Gegenstände, die in dieser Station geprüft werden können, wären aus unserer Sicht: Informationen zum Behandlungsziel Abstinenz versus kontrolliertem Trinken bei Sucht und Ableitung eines Therapieziels; Therapeutin oder Therapeut möchte Kurzzeittherapie regulär beenden, wobei die Patientin oder der Patient fragt, ob es nicht Möglichkeiten zur Verlängerung gäbe; eine Mutter hatte Stress in der Schwangerschaft und hat geraucht, weshalb sie sich jetzt an die Therapeutin oder den Therapeuten wendet mit der Frage: „Kann es sein, dass mein Kind deshalb ADHS hat?“; eine Patientin mit einer depressiven Störung ist sich unsicher, ob sie eine medikamentöse Therapie einer Psychotherapie vorziehen sollte (Shared-decision making). Da viele der simulierten Rollenspiele in dieser vierten Station zeitlich nicht besonders lange dauern werden, können hier einige Themen abgeprüft werden.

Diese Kompetenzen zum Bereich Patientinnen- und Patienteninformation und Patientinnen- und Patientenaufklärung werden gemäß der PsychThApprO (Anlage 2) in den Inhalten bzw. Modulen 3. spezielle Störungs- und Verfahrenslehre der Psychotherapie, 4. angewandte Psychotherapie, 5. Dokumentation, Evaluierung und Organisation psychotherapeutischer Behandlungen, 7. berufsqualifizierende Tätigkeit II – vertiefte Praxis der Psychotherapie – vermittelt sowie der Berufsqualifizierenden Tätigkeit III – angewandte Praxis der Psychotherapie (Paragraph 18) –praxisbasiert vertieft.

### Fünfte Station: Leitlinienorientierte Behandlungsempfehlungen

Gegenstand der fünften Station ist der Kompetenzbereich **Leitlinienorientierte Behandlungsempfehlungen**. In diesem Kompetenzbereich hat die Prüfungskandidatin oder der Prüfungskandidat zu zeigen, dass sie oder er die Patientinnen und Patienten angemessen und diagnosebezogen über empfohlene Behandlungsmöglichkeiten informiert und auch solche Behandlungsmöglichkeiten einbezieht, die außerhalb des eigenen Spezialisierungsbereichs liegen (vgl. Tab. ESM 4).

Durch das neue Psychotherapeutengesetz haben Leitlinienempfehlungen einen neuen Stellenwert erhalten, weshalb bei dieser Station die jeweils aktuellen Leitlinien einzubeziehen sind, welche die Prüfungskandidierenden kennen und die oder den SP entsprechend darüber informieren können sollten. Das hat zur Folge, dass Prüfungskandidierende in einer kritisch-wissenschaftlichen Bewertung der psychotherapeutischen Verfahren und Methoden geschult sein sollten sowie sich mit anderen Behandlungen (medikamentös oder nicht-medikamentös) und therapeutischen Settings (Einzel-, Gruppen- Familientherapie, Internet- und mobilbasierte Interventionen) auseinandergesetzt haben sollten, die in den Leitlinien oft sehr differenziert empfohlen werden.

**Tabelle ESM 4.** Vorschlag für Themen des Kompetenzbereich 5 (Leitlinienorientierte Behandlungsempfehlungen) mit Beispielen, spezifischen Kompetenzen und deren Bewertung (Checkliste)

| Thema / Gegenstand                                                          | Beispiel-Situationen                                                                                                                                                                                                                                                                                                                                                                                                                                                                                                                                                                                                                                                                                                                                    | Spezifische Kompetenzen                                                                                                                                                                                                                                                                                  | Bewertung (Checkliste)                                                                                                                                                                                                                                                                                                                                                                                                                                                                                                                                                                                                                                                                                                                                                                    |
|-----------------------------------------------------------------------------|---------------------------------------------------------------------------------------------------------------------------------------------------------------------------------------------------------------------------------------------------------------------------------------------------------------------------------------------------------------------------------------------------------------------------------------------------------------------------------------------------------------------------------------------------------------------------------------------------------------------------------------------------------------------------------------------------------------------------------------------------------|----------------------------------------------------------------------------------------------------------------------------------------------------------------------------------------------------------------------------------------------------------------------------------------------------------|-------------------------------------------------------------------------------------------------------------------------------------------------------------------------------------------------------------------------------------------------------------------------------------------------------------------------------------------------------------------------------------------------------------------------------------------------------------------------------------------------------------------------------------------------------------------------------------------------------------------------------------------------------------------------------------------------------------------------------------------------------------------------------------------|
| Aufklärung und Information über Behandlungen für Betroffene oder Angehörige | <ul style="list-style-type: none"> <li>● <i>Vermitteln Sie gemäß aktueller Leitlinien neutral und wissenschaftlich fundiert Informationen über Behandlungen, Verfahren und Methoden (anhand einer kurzen Fallvignette eines weit verbreiteten Störungsbildes)</i></li> <li>● <i>„Psychopharmaka machen doch abhängig, oder nicht?“</i></li> <li>● <i>„Muss mein Sohn mit Schizophrenie wirklich in die Psychiatrie? Was wären Alternativen?“</i></li> <li>● <i>„Wir suchen eine gute Klinik für unsere Tochter mit Essstörungen. An welchen Merkmalen könnte ich eine gute Klinik dafür erkennen?“</i></li> <li>● <i>„Ich kann nicht so lange in der Schule fehlen, ich kann nicht in die Psychiatrie. Was kann ich stattdessen machen?“</i></li> </ul> | <ul style="list-style-type: none"> <li>● Neutrale und wissenschaftliche Informationsvermittlung über Behandlungsoptionen, wissenschaftlich fundierter und anerkannter Verfahren und Methoden, störungsspezifische Behandlungsempfehlungen basierend auf den aktuellen Leitlinien und Gesetzen</li> </ul> | <p>6 = exzellent, 5 = sehr gut, 4 = gut, 3 = zufriedenstellend, 2 = mittelmäßig, 1 = gerade ausreichend, 0 = mangelhaft; anbei jeweils Beispiele für <b>6, 4, 2</b> und <b>0</b></p> <p>P gelingt es dem Alter entsprechend exzellent, empathisch und informiert über die entsprechende Behandlungsoptionen aufzuklären (<b>6</b>)</p> <p>P gelingt es dem Alter entsprechend gut, empathisch und informiert über die entsprechende Behandlungsoptionen aufzuklären (<b>4</b>)</p> <p>P gelingt es dem Alter entsprechend mittelmäßig, empathisch und informiert über die entsprechende Behandlungsoptionen aufzuklären (<b>2</b>)</p> <p>P ist nicht in der Lage, empathisch und informiert dem Alter entsprechend über die entsprechende Behandlungsoptionen aufzuklären (<b>0</b>)</p> |

Anmerkungen: P = Prüfungskandidatin bzw. Prüfungskandidat, SP = Simulationspatientin bzw. Simulationspatient.

Diese Kompetenzen zum Bereich Leitlinienorientierte Behandlungsempfehlungen werden gemäß der PsychThApprO (Anlage 2) in den Inhalten bzw. Modulen 2. vertiefte Forschungsmethodik, 3. spezielle Störungs- und Verfahrenslehre der Psychotherapie, 4. angewandte Psychotherapie, 5. Dokumentation, Evaluierung und Organisation psychotherapeutischer Behandlungen, 7. berufsqualifizierende Tätigkeit II – vertiefte Praxis der Psychotherapie - und 8. Selbstreflexion vermittelt sowie der Berufsqualifizierenden Tätigkeit III – angewandte Praxis der Psychotherapie (Paragraph 18) – praxisnah vertieft.

## **ESM 4: Weitere Ausführungen zu konkreten Vorschlägen zur Qualitätskontrolle**

Wie durch die Empfehlungen zur inhaltlichen Gestaltung bereits ersichtlich, wird sich die Umsetzung der Parcoursprüfungen sowohl inhaltlich als auch organisatorisch anspruchsvoll und aufwändig gestalten, was ebenfalls auf die Sicherstellung und Kontrolle der Qualität zutrifft. Im Folgenden möchten wir einige spezifische Empfehlungen zur Sicherstellung einer Qualitätskontrolle vorschlagen.

### **Empfehlung: Spezifikationen der Beurteilungen**

In der ApprO wird als 5. Teil der Prüfungsaufgabe ein Strukturierter Bewertungsbogen für die Prüferinnen und Prüfer angeführt, der 1) Musterlösung, 2) fürs Leistungsmerkmal höchstmögliche Punktzahl und 3) Bestehensgrenze angeben sollte. Pro Vignette werden also mehrere Leistungsbewertungen vorgenommen – eine Situation die psychometrisch als sogenannte Testletstruktur bezeichnet wird. Für jede Vignette haben wir im vorangegangenen Abschnitt Vorschläge für Bewertungen gemacht. Die Bewertungen der zu demonstrierenden Kompetenzen sollen möglichst unabhängig voneinander erfolgen, so dass zielgenau ein erschöpfendes Bild der in einer Vignette erbrachten Leistungen entsteht und die Beurteilungen keinen Globaleindruck abbilden. Wünschenswert wäre die planmäßige Sammlung der Prüfungsleistungen, um in übergreifenden Modellen Schwierigkeiten einzelner Vignetten oder Prüfungsorte aufzuzeigen.

Sollte es sich trotz der Verfeinerung der Checklisten (z.B. durch Konkretisierung von Verhaltensbeschreibungen und Anker) und Ratertrainings zeigen, dass bei den Tabellen der fünf Parcoursstationen dargestellten Checklisten keine ausreichende Beurteilungsübereinstimmung zu erlangen ist, können auch Beurteilungsinstrumente für die Parcoursprüfung gezielt adaptiert werden, die sich hinsichtlich der Reliabilität bereits bewährt haben (z.B. Weck et al., 2010; vgl. Review und Metaanalyse: Kühne et al., 2020).



## **Empfehlungen zur Einführung von Probe-Stationen sowie Parcours-Prüfungsformate während des M.Sc. Studiengangs für die fortwährende und qualitätsgesicherte Erarbeitung von Stationen**

Grundsätzlich ist die Parcoursprüfung als sogenannte high-stakes Prüfung zu verstehen – als Prüfung also, deren Ergebnis für die geprüften Studierenden die berufliche Zukunft mitbestimmt und die Auskunft über den Erfolg vorauslaufender Qualifikationsphasen liefert. Um den Charakter und die Beschaffenheit dieser Prüfung zu illustrieren, empfehlen wir, mehrere (digitale) Probe-Stationen mit aufgeschlüsselten Bewertungsschemata kostenfrei zugänglich zu entwickeln, zum Beispiel in Form von Video-Clips, die typische Prüfungssituationen und Bewertungsprozesse zu illustrieren. In Abhängigkeit von der Anzahl an Prüfungsterminen muss eine angemessene Anzahl an Parcours verfügbar sein. Konkretisierungen über die maximale Frequenz des Einsatzes von Stationen (sogenannte Exposure) sind erforderlich (Revuelta & Ponsoda, 1998). Während früher oftmals der wiederholte Einsatz von Prüfungsaufgaben in der schriftlichen Klausur der Approbationsprüfung vermieden wurde, erscheint dies hier wegen der zentralen Bedeutung einzelner Handlungen unvermeidbar (s.u.). Da die empirische Erkundung der Eigenschaften von Stationen (etwa Schwierigkeit, Überlappung mit weiteren Stationen) vor dem high-stakes Einsatz wünschenswert ist, sollte im Rahmen einer Experimentierklausel (wie sie auch für Hochschulzulassungstests gilt) über den Einsatz von zu erprobenden Stationen im Rahmen der Parcoursprüfung nachgedacht werden, ohne dass diese Stationen in die Bewertung der Prüfungsleistungen einfließt. Sofern perspektivisch hinreichend viele erprobte Stationen vorliegen, können gängige und etablierte psychometrische Methoden des Vergleichs verschiedener Parcoursprüfungen etabliert werden. Hierzu können über sogenannte Linking- oder Equating-Verfahren Personen, die Prüfungen mit teilweise oder vollständig verschiedenen Stationen bearbeitet haben, auf die gleiche Metrik gebracht werden (Lee & Lee, 2018).

Wir empfehlen schließlich, den Dozierenden Informationen zu den Parcoursprüfungen einschließlich vergleichbarer Vignetten zur Verfügung zu stellen, damit diese die Studierenden auf die Prüfungen optimal vorbereiten können. Entsprechend könnten einzelne Module des Masterstudienganges durch vergleichbare anwendungsorientierte Parcours-Formate geprüft werden, wie es an einigen Hochschulen bereits erfolgreich durchgeführt wird (vgl. Brakemeier et al., 2020). Dies bietet sich insbesondere für folgende Inhalte an, die in der PsychThApprO für den Masterstudiengang im Rahmen der hochschulischen Lehre festgehalten werden (vgl. Anlage 2 der PsychThApprO): Spezielle Störungs- und Verfahrenslehre der Psychotherapie, Angewandte Psychotherapie, Vertiefte Psychologische Diagnostik und Begutachtung.

## **Danksagung**

Wir möchten der DGPs und der Leitung des Fakultätentags für das Vertrauen danken, die neue Prüfungsform zu kommentieren. Zudem danken wir herzlich unseren Kolleginnen Julia Asbrand (Humboldt-Universität Berlin) und Silvia Schneider (Universität Bochum) sowie unseren Kollegen Harald Baumeister (Universität Ulm) und Florian Weck (Universität Potsdam) für die Durchsicht und wertvollen Anregungen zu dem Manuskript. Besonderer Dank gilt der Studierenden Zoë Ullrich-Winter (Universität Greifswald) für die Unterstützung bei der Erstellung des Manuskriptes.

## Vollständiges Literaturverzeichnis

- Alpers, G.W., & Steiger-White, F. (2020). Simulationspatienten im universitären Psychologiestudium: Einführung einer innovativen Methode zur Stärkung praxisorientierter Lehre in klinischer Psychologie und Psychotherapie. *Verhaltenstherapie*, 30, 104–116.
- Arbeitsgemeinschaft für Methodik und Dokumentation in der Psychiatrie (AMDP) (2018). *Das AMDP-System: Manual zur Dokumentation psychiatrischer Befunde*. Göttingen: Hogrefe.
- Beesdo-Baum, K., Zaudig, M., Wittchen, H.-U. (2019a). *Strukturiertes Klinisches Interview für DSM-5®-Störungen – Klinische Version*. Deutsche Bearbeitung des Structured Clinical Interview for DSM-5® Disorders – Clinician Version von Michael B. First, Janet B. W. Williams, Rhonda S. Karg, Robert L. Spitzer. Göttingen: Hogrefe.
- Beesdo-Baum, K., Zaudig, M., Wittchen, H.-U. (2019b). *Strukturiertes Klinisches Interview für DSM-5® – Persönlichkeitsstörungen*. Deutsche Bearbeitung des Structured Clinical Interview for DSM-5® – Personality Disorders von Michael B. First, Janet B. W. Williams, Lorna Smith Benjamin, Robert L. Spitzer. Göttingen: Hogrefe.
- Brakemeier, E. L., Pilz, K., Richter, J. & Kaiser, T. (2020). Umsetzbarkeit und Erleben: Erste Erfahrungen mit einer Kurzform der anwendungsorientierten Parcoursprüfung im MSc-Studiengang Psychologie. *Verhaltenstherapie*, 30, 141–155.
- Bundesgesetzblatt (Jahrgang 2019). Teil 1 Nr. 40, ausgegeben zu Bonn am 22. November 2019.
- Bundesgesetzblatt (Jahrgang 2020). Teil I Nr. 11, ausgegeben zu Bonn am 12. März 2020.
- Bundespsychotherapeutenkammer (2014). *Kompetenzen für den Psychotherapeutenberuf in Studium und Aus-/Weiterbildung*. Berlin [https://www.bptk.de/wp-content/uploads/2019/01/20141118\\_kompetenzprofil\\_stand\\_06052014.pdf](https://www.bptk.de/wp-content/uploads/2019/01/20141118_kompetenzprofil_stand_06052014.pdf)
- Caspar, F., Deisenhofer, A. K., Evers, O., Laireiter, A. R., Lutz, W., Prinz, J., Rief, W., Strauß, B. & Taubner, S. (2021). Psychotherapeutische Kompetenzen. In W. Rief, E. Schramm & B. Strauß (Hrsg.), *Psychotherapie – ein kompetenzorientiertes Lehrbuch* (S. 3-30). München: Elsevier.
- Chisnall, B., Vince, T., Hall, S. & Tribe, R. (2015). Evaluation of outcomes of a formative objective structured clinical examination for second-year UK medical students. *International Journal of Medical Education* 6, 76–83. <https://doi.org/10.5116/ijme.5572.a534>.
- Egle, UT. (2020). Langzeitfolgen früher Stresserfahrungen für die körperliche Gesundheit und Lebenserwartung. In: Egle, U.T., Heim, C., Strauß, B., von Känel, R., Eds. *Psychosomatik – Neurobiologisch fundiert und evidenzbasiert* (S. 247–254). Stuttgart: Kohlhammer.
- Evers, O. & Taubner, S. (2018). Feedback in der Psychotherapieausbildung. *Psychotherapeut* 63 (6), 465–472. <https://doi.org/10.1007/s00278-018-0311-3>.

- Evers, O. Schröder-Pfeifer, P., Möller, H. & Taubner, S. (2021). The competence development of German psychotherapy trainees: A naturalistic, longitudinal and multidimensional outcome study, *Psychotherapy Research*, <https://doi.org/10.1080/10503307.2021.1950939>
- Gerlach, H. (2021). Berufsrecht für Psychotherapeutinnen. In W. Rief, E. Schramm & B. Strauß (Hrsg.), *Psychotherapie – ein kompetenzorientiertes Lehrbuch* (S. 751-758). München: Elsevier.
- Harden, R. M., Stevenson, M., Downie, W. W. & Wilson, G. M. (1975). Assessment of clinical competence using objective structured examination. *British Medical Journal* 1 (5955), 447–451. <https://doi.org/10.1136/bmj.1.5955.447>
- Henkel, M., Michel, S., Gaubatz, S., Keymer, A., Brakemeier, E. L. & Benecke, C. (2019). Schwierige Situationen in der Psychotherapie und wie Therapeuten mit ihnen umgehen. *Zeitschrift für Psychosomatische Medizin und Psychotherapie*, 65(4), 372–384. <https://doi.org/10.13109/zptm.2019.65.4.372>
- Hodges, B. D., Hollenberg, E., McNaughton, N., Hanson, M. D. & Regehr, G. (2014). The Psychiatry OSCE: a 20-year retrospective. *Academic Psychiatry: the Journal of the American Association of Directors of Psychiatric Residency Training and the Association for Academic Psychiatry*, 38 (1), 26–34. <https://doi.org/10.1007/s40596-013-0012-8>
- Jacobi, F. (2017). Diagnostik zur Therapieplanung, Verlaufskontrolle und Ergebnisbewertung. In: E.L. Brakemeier & F. Jacobi (Eds.), *Verhaltenstherapie in der Praxis* (S. 127–137). Weinheim: Beltz.
- Jacobi, F., Spies, J. & Brakemeier, E.L. (2017). Umgang mit schwierigen Situationen zu Beginn der Therapie. In: E.L. Brakemeier & F. Jacobi (Eds.), *Verhaltenstherapie in der Praxis* (S. 93–104). Weinheim: Beltz.
- Kern, D.E. (2009). Curriculum development for medical education: a six-step approach. (2. ed.). Baltimore: Johns Hopkins Univ. Press.
- Kühne, F., Ay, D. S., Otterbeck, M. J. & Weck, F. (2018). Standardized Patients in Clinical Psychology and Psychotherapy: a Scoping Review of Barriers and Facilitators for Implementation. *Academic Psychiatry: the Journal of the American Association of Directors of Psychiatric Residency Training and the Association for Academic Psychiatry*, 42(6), 773–781. <https://doi.org/10.1007/s40596-018-0886-6>
- Kühne, F., Maaß, U. & Weck, F. (2021). Einsatz standardisierter Patienten im Psychologiestudium: Von der Forschung in die Praxis. *Verhaltenstherapie*, 31, 152–160. <https://doi.org/10.1159/000509249>
- Kühne, F., Meister, R., Maaß, U., Paunov, T. & Weck, F. (2020). How Reliable Are Therapeutic Competence Ratings? Results of a Systematic Review and Meta-Analysis. *Cognitive Therapy and Research*, 44, 241-257.
- Margraf, J., Cwik, J. C., von Brachel, R., Suppiger, A. & Schneider, S. (2021). DIPS Open Access 1.2: Diagnostic Interview for Mental Disorders. [DIPS Open Access 1.2:

- Diagnostisches Interview bei psychischen Störungen.] Bochum: Mental Health Research and Treatment Center, Ruhr-Universität Bochum. <https://doi.org/10.46586/rub.172.149>
- Lee, W. C. & Lee, G. (2018). IRT Linking and Equating. In *The Wiley Handbook of Psychometric Testing* (eds P. Irwing, T. Booth and D.J. Hughes). <https://doi.org/10.1002/9781118489772.ch21>
- Margraf, J., Cwik, J. C., Pflug & Schneider, S. (2017). Structured clinical interviews for mental disorders across the lifespan: Psychometric quality and further developments of the DIPS Open Access interviews. [Strukturierte klinische Interviews zur Erfassung psychischer Störungen über die Lebensspanne: Gütekriterien und Weiterentwicklungen der DIPS-Verfahren.] *Zeitschrift für Klinische Psychologie und Psychotherapie*, 46(3).
- Noyon, A. & Heidenreich, T. (2020). *Schwierige Situationen und Therapie und Beratung* (3., erweiterte Auflage). Weinheim: Beltz.
- Park, R. S., Chibnall, J. T., Blaskiewicz, R. J., Furman, G. E. Powell, J. K., Mohr & C. J. (2004). Construct validity of an objective structured clinical examination (OSCE) in psychiatry: associations with the clinical skills examination and other indicators. *Academic Psychiatry: the Journal of the American Association of Directors of Psychiatric Residency Training and the Association for Academic Psychiatry* 28 (2), 122–128. <https://doi.org/10.1176/appi.ap.28.2.122>.
- Partschefeld, E., Strauß, B., Geyer, M. & Philipp, S. (2013). Simulationspatienten in der Psychotherapieausbildung. *Psychotherapeut*, 58 (5), 438–445. <https://doi.org/10.1007/s00278-013-1002-8>.
- Revuelta, J. & Ponsoda, V. (1998). A Comparison of Item Exposure Control Methods in Computerized Adaptive Testing. *Journal of Educational Measurement*, 35, 311–327. <https://doi.org/10.1111/j.1745-3984.1998.tb00541.x>
- Rief W. (2021). Moving from tradition-based to competence-based psychotherapy. *Evidence-based mental health*, 24 (3), 115–120. Advance online publication. <https://doi.org/10.1136/ebmental-2020-300219>
- Rief, W., Schramm E. & Strauß, B. (2021). *Psychotherapie – ein kompetenzorientiertes Lehrbuch*. München: Elsevier
- Rief, W. & Strauß, B. (2021). Ein verfahrensübergreifendes Modell für psychische Störungen als Grundlage der Therapieplanung. In W. Rief, E. Schramm & B. Strauß (Hrsg.), *Psychotherapie – ein kompetenzorientiertes Lehrbuch* (S. 57-64). München: Elsevier.
- Schneider, S., Pflug, V., In-Albon, T. & Margraf, J. (2017). *Kinder-DIPS Open Access: Diagnostisches Interview bei psychischen Störungen im Kindes- und Jugendalter*. Bochum: Forschungs- und Behandlungszentrum für psychische Gesundheit, Ruhr-Universität Bochum. <https://doi.org/10.13154/rub.101.90>
- Sperry, L. (2010). *Core Competencies in Counseling and Psychotherapy: Becoming a Highly Competent and Effective Therapist*. New York: Routledge.

- Strauß, B. (2021). Unerwünschte Behandlungseffekte und Nebenwirkungen. In W. Rief, E. Schramm & B. Strauß (Hrsg.), *Psychotherapie – ein kompetenzorientiertes Lehrbuch* (S.769-776). München: Elsevier.
- Teismann, T. & Dormann W. (2021). *Suizidalität* (2. aktualisierte Auflage). Göttingen: Hogrefe.
- Trachsel, M. (2021). Ethik in der Psychotherapie. In W. Rief, E. Schramm & B. Strauß (Hrsg.), *Psychotherapie – ein kompetenzorientiertes Lehrbuch* (S. 743-750). München: Elsevier.
- Turner, J. L. & Dankoski, M. E. (2008). Objective structured clinical exams: a critical review. *Family Medicine*, 40 (8), S. 574–578. <https://doi.org/>
- Vaidya, N. A. (2008). Psychiatry clerkship Objective Structured Clinical Examination is here to stay. *Academic Psychiatry: the Journal of the American Association of Directors of Psychiatric Residency Training and the Association for Academic Psychiatry* 32 (3), 177–179. <https://doi.org/10.1176/appi.ap.32.3.177>.
- Walters, K., Osborn, D. & Raven, P. (2005). The development, validity and reliability of a multimodality objective structured clinical examination in psychiatry. *Medical Education*, 39 (3), 292–298. <https://doi.org/10.1111/j.1365-2929.2005.02091.x>.
- Weck, F., Hautzinger, M., Heidenreich, T & Stangier, U. (2013). Erfassung psychotherapeutischer Kompetenzen – Validierung einer deutschsprachigen Version der Cognitive Therapy Scale. *Zeitschrift für Klinische Psychologie und Psychotherapie*, 39 (4), 244–250. <https://doi.org/10.1026/1616-3443/a000055>
- Weck, F. (2013). *Psychotherapeutische Kompetenzen*. Berlin, Heidelberg: Springer.
- Wilhelm, O. & Nickolaus, R. (2013). Was grenzt das Kompetenzkonzept von etablierten Kategorien wie Fähigkeit, Fertigkeit oder Intelligenz ab?. *Zeitschrift für Erziehungswissenschaft*, 16, 23–26 (2013). <https://doi.org/10.1007/s11618-013-0380-6>
- Wilhelm, M., Rief, W., Haberkamp, A., von Blanckenburg, P. & Glombiewski, J. A. (2020). Studium zur Psychotherapie-Approbation als Herausforderung und Chance: Praktische Hochschullehrkonzepte in der klinischen Psychologie und Psychotherapie. In: *Verhaltenstherapie* 30 (Suppl. 2), S. 117–127. <https://doi.org/10.1159/000507902>.
- Willutzki, U., Fydrich, T. & Strauß, B. (2015). Aktuelle Entwicklungen in der Psychotherapieausbildung und der Ausbildungsforschung. *Psychotherapeut* 60 (5), 353–364. [https://doi.org/DOI: 10.1007/s00278-015-0048-1](https://doi.org/DOI:10.1007/s00278-015-0048-1).
- Willutzki, U. & Schürmann-Vengels, J. (2021). Ressourcen und Resilienzfaktoren. In W. Rief, E. Schramm & B. Strauß (Hrsg.), *Psychotherapie – ein kompetenzorientiertes Lehrbuch* (S. 65-74). München: Elsevier.
